# Supplementary material for: A comparison of methods for estimating substitution rates from ancient DNA sequence data
Source: PubMed Central journal article supplement (PMC5956955; doi:10.1186/s12862-018-1192-3), 2018-05-16
Supplement: 12862_2018_1192_MOESM1_ESM.pdf [file 12862_2018_1192_MOESM1_ESM.pdf]

### a. Mean rate (subs/site/year)

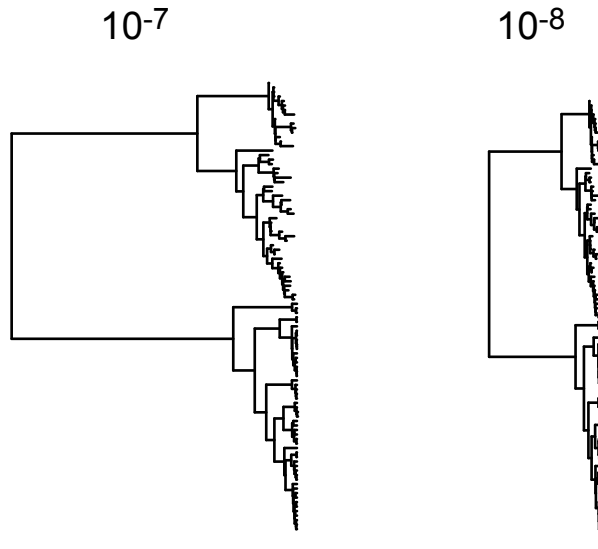

### b. Variance in rate (as proportion of mean rate)

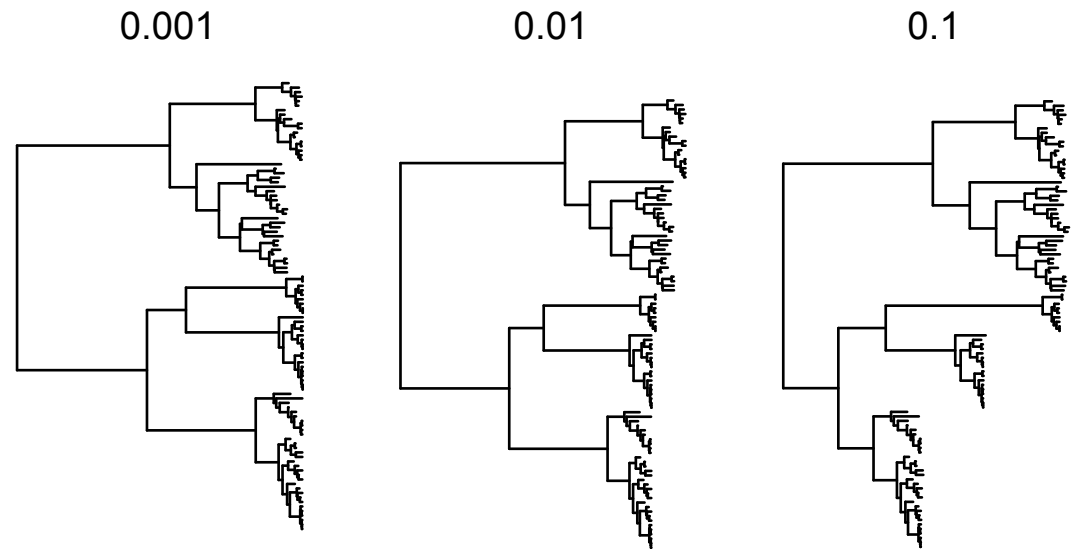

### c. Temporal clustering of samples

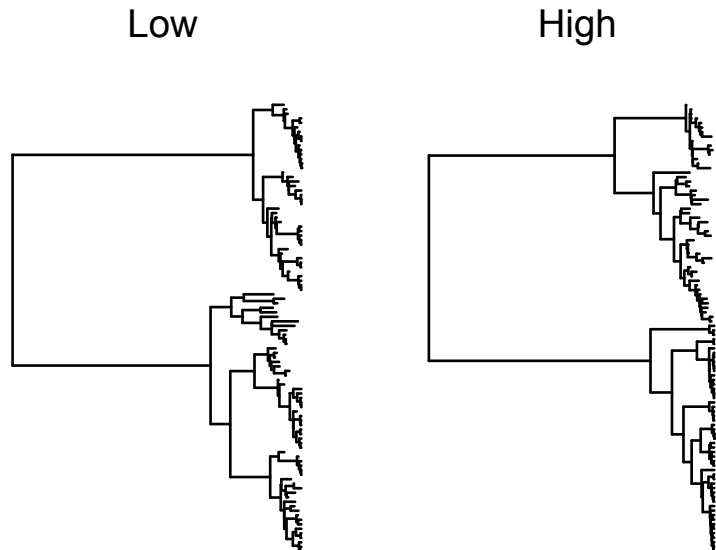

### d. Method of inference

#### **TempEst**

Regression of root-to-tip distances  
Strict molecular clock

#### **LSD**

Least-squares estimation  
Allows deviations from strict clock

#### **BEAST**

Bayesian inference  
Relaxed molecular clock
