# Supplementary material for: A comparison of methods for estimating substitution rates from ancient DNA sequence data
Source: PubMed Central journal article supplement (PMC5956955; doi:10.1186/s12862-018-1192-3), 2018-05-16

Low stemminess  
(0.51)

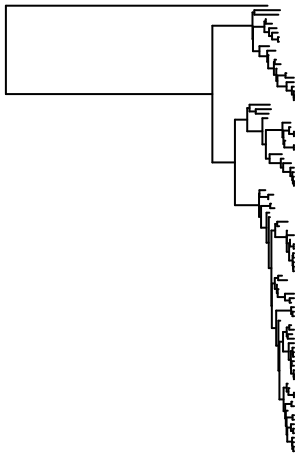

High stemminess  
(0.86)

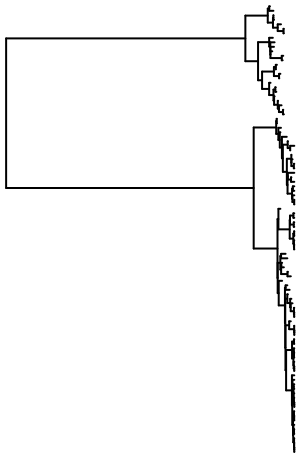

Supplement: 12862_2018_1192_MOESM4_ESM.pdf [file 12862_2018_1192_MOESM4_ESM.pdf]
